# Supplementary material
Source: PubMed Central journal article supplement (PMC6320321)

# Weight Z-score by OI Subtype and Age

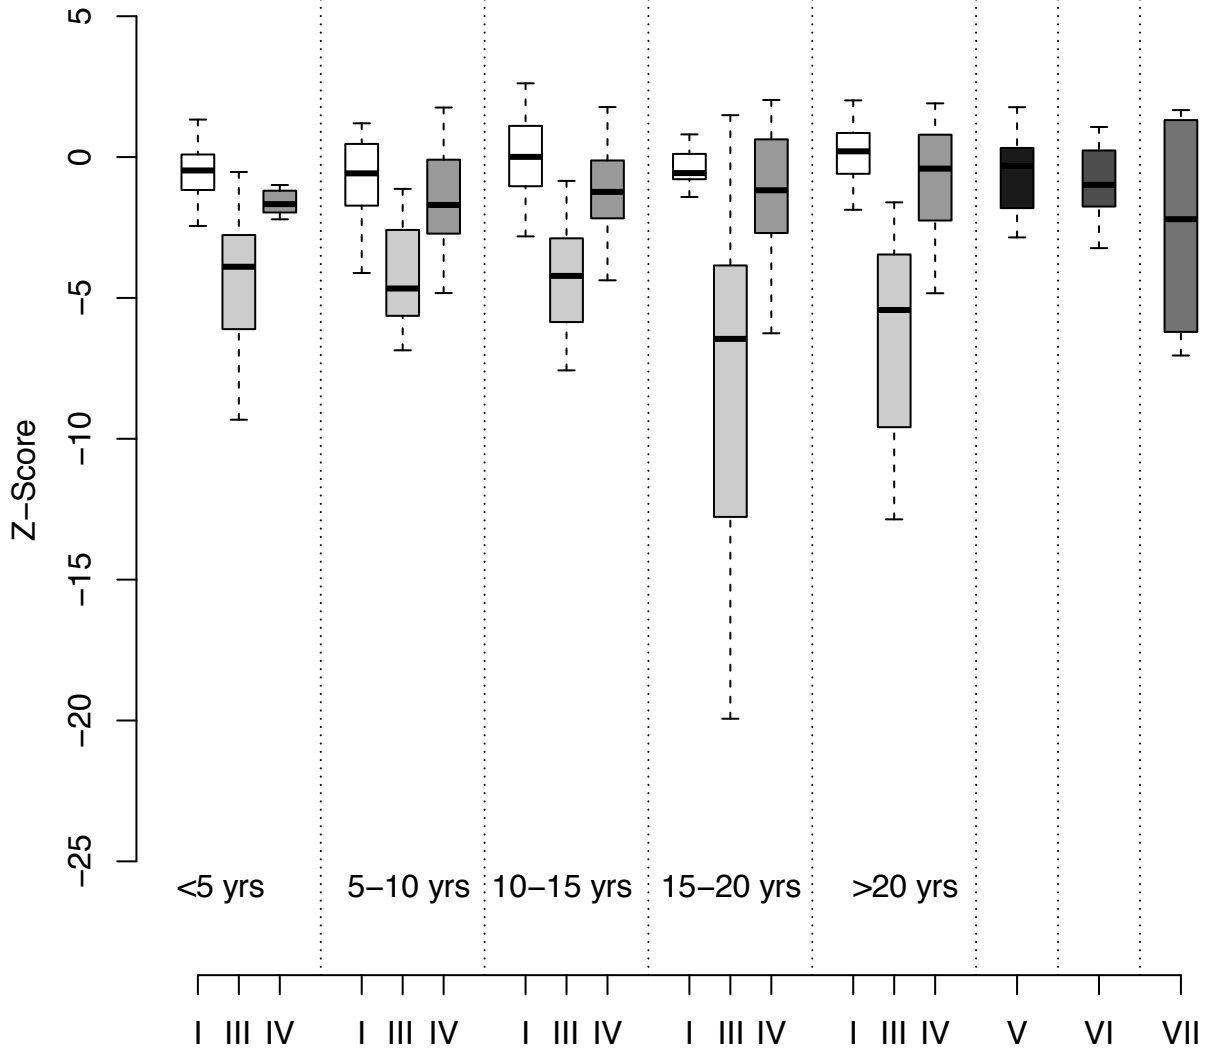

Supplement: NIHMS961139-supplement-Supplementary_Figure_1.pdf [file NIHMS961139-supplement-Supplementary_Figure_1.pdf]

# BMI Z-score by OI Subtype and Age

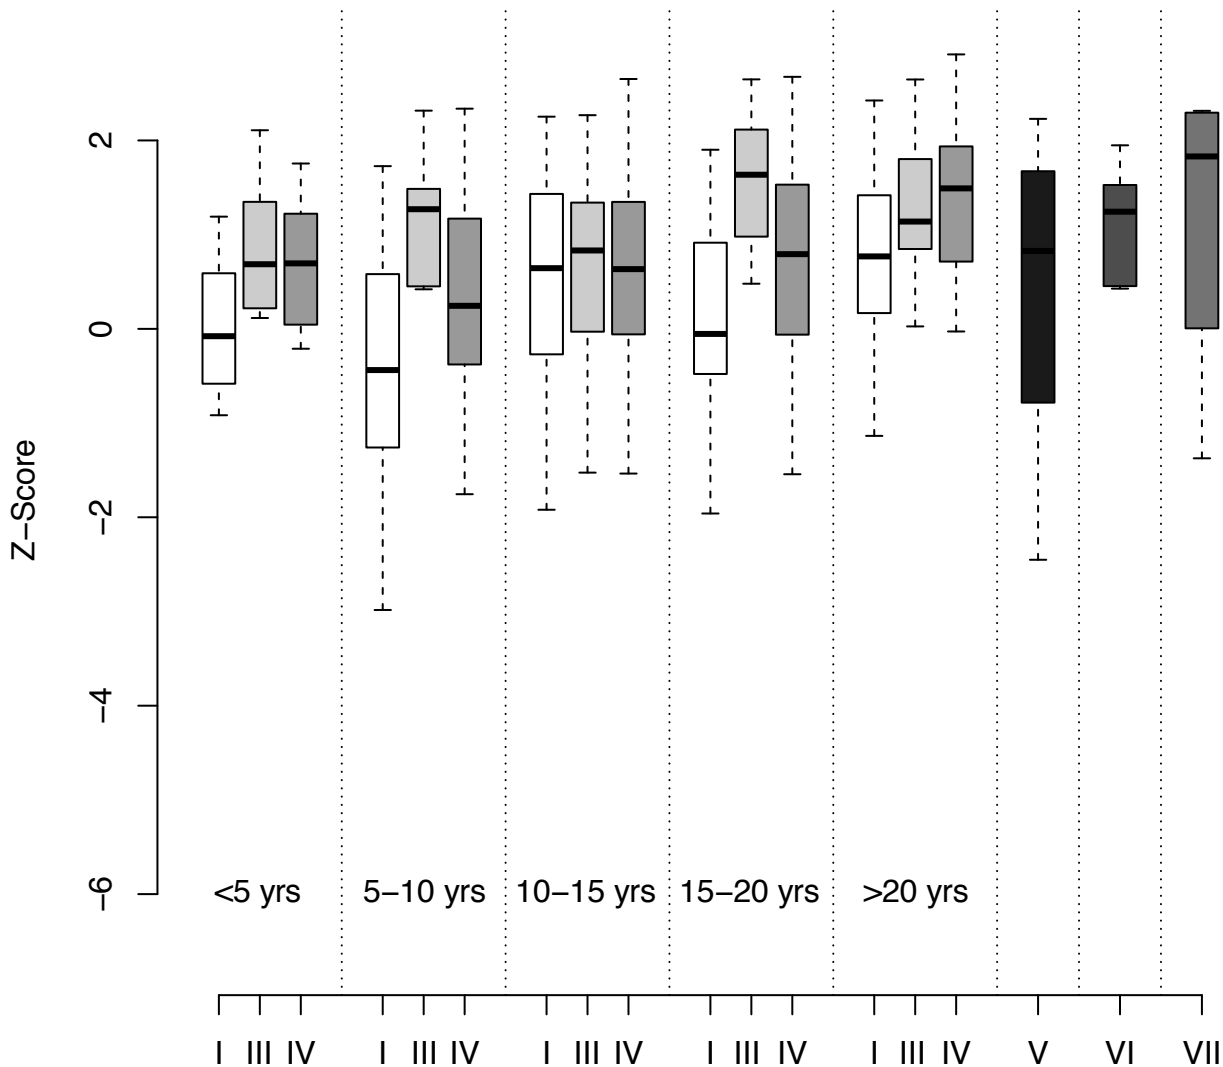

Supplement: NIHMS961139-supplement-Supplementary_Figure_2.pdf [file NIHMS961139-supplement-Supplementary_Figure_2.pdf]

# OI Armspan/Height

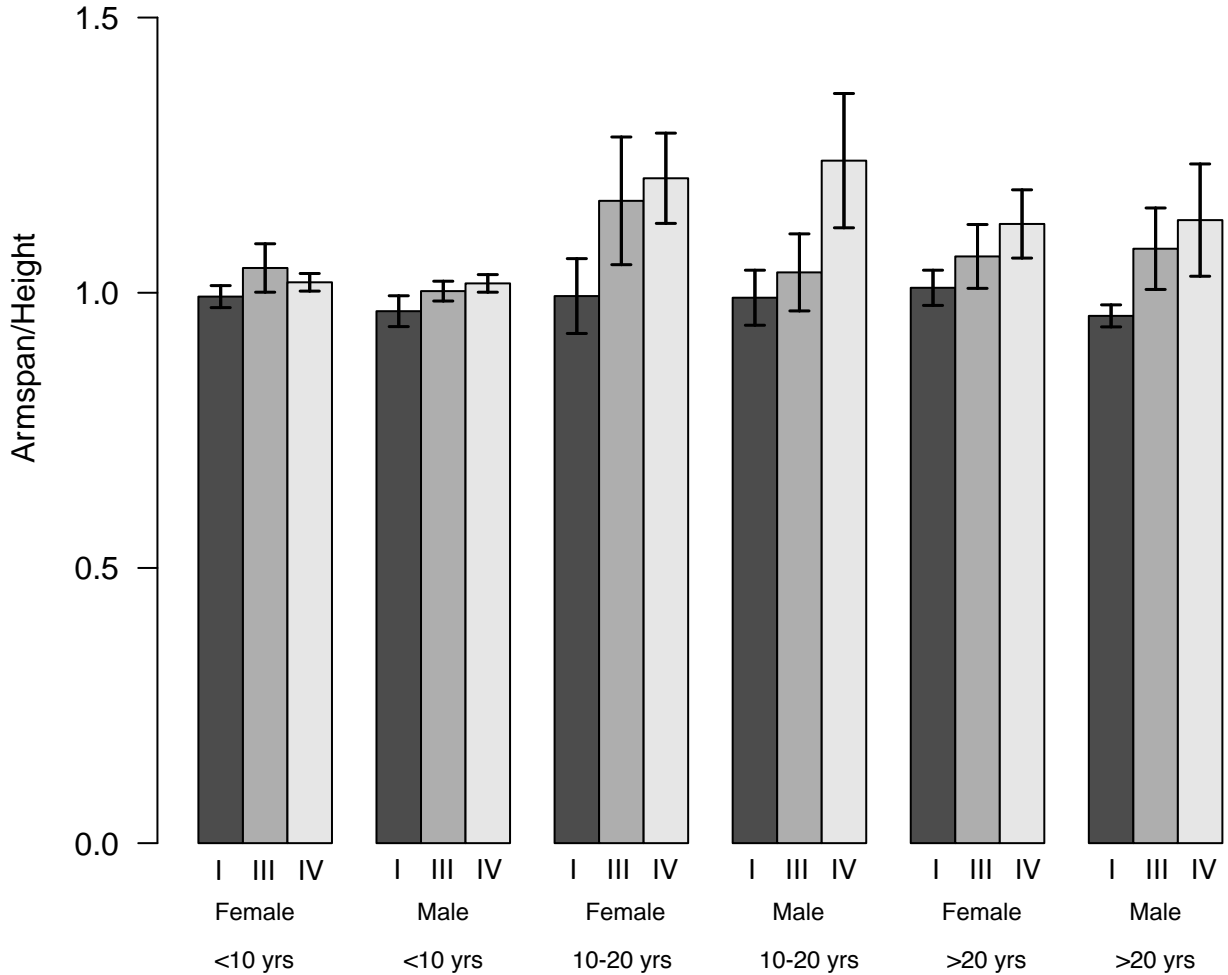

Supplement: NIHMS961139-supplement-Supplementary_Figure_3.pdf [file NIHMS961139-supplement-Supplementary_Figure_3.pdf]
